## 23 **Abstract**

24 Incorporation of microbial community data into environmental monitoring programs  
25 could improve prediction and management of environmental pressures. Coral reefs  
26 have experienced dramatic declines due to cumulative impacts of local and global  
27 stressors. Here we assess the utility of free-living (i.e. seawater and sediment) and  
28 host-associated (i.e. corals, sponges and macroalgae) microbiomes for diagnosing  
29 environmental perturbation based on their habitat-specificity, environmental  
30 sensitivity and uniformity. We show that the seawater microbiome has the greatest  
31 diagnostic value, with environmental parameters explaining 56% of the observed  
32 compositional variation and temporal successions being dominated by uniform  
33 community assembly patterns. Host-associated microbiomes, in contrast, were five-  
34 times less affected by the environment and their community assembly patterns were  
35 generally less uniform. Further, seawater microbial community data provided an  
36 accurate prediction on the environmental state, highlighting the diagnostic value of  
37 microorganisms and illustrating how long-term coral reef monitoring initiatives could  
38 be enhanced by incorporating assessments of microbial communities in seawater.

## 39 **Importance**

40 The recent success in disease diagnostics based on the human microbiome has  
41 highlighted the utility of this approach for model systems. However, despite improved  
42 prediction and management of environmental pressures from the inclusion of  
43 microbial community data in monitoring programs, this approach has not previously  
44 been applied to coral reef ecosystems. Coral reefs are facing unprecedented  
45 pressure on a local and global scale, and sensitive and rapid markers for ecosystem

46 stress are urgently needed to underpin effective management and restoration  
47 strategies. In this study, we performed the first assessment of the diagnostic value of  
48 multiple free-living and host-associated reef microbiomes to infer the environmental  
49 state of coral reef ecosystems. Our results reveal that free-living microbial  
50 communities have a higher potential to infer environmental parameters than host-  
51 associated microbial communities due to their higher determinacy and environmental  
52 sensitivity. We therefore recommend timely integration of microbial sampling into  
53 current coral reef monitoring initiatives.

54

## 55 **Introduction**

56 Coral reef ecosystems are rapidly degrading due to local and global pressures (1).  
57 Overfishing, pollution, declining water quality, disease and outbreaks of coral  
58 predating crown-of-thorns starfish are responsible for localised reef degradation (2)  
59 while climate change is impacting reefs on a global scale, including remote reefs with  
60 little local anthropogenic pressure (3). For example, elevated sea surface  
61 temperatures caused back-to-back coral mass bleaching events in 2016 and 2017,  
62 resulting in a significant loss of shallow-water corals on the Great Barrier Reef (GBR)  
63 (4). Climate conditions predicted for the end of the century will result in even more  
64 frequent and severe coral mass bleaching events with dire projections for the future  
65 of coral reefs (5, 6). This global coral reef crisis is driving the development of new  
66 management, reef restoration and bioengineering tools to counteract reef loss and  
67 ensure the persistence of coral reefs (7, 8). Early prediction of ecosystem stress is  
68 critical for an effective implementation of local management and restoration  
69 strategies on threatened reef sites.

70           Microorganisms have considerable potential as a monitoring tool for coral reef  
71 ecosystem health (9-11). Microorganisms are fundamental drivers of biogeochemical  
72 cycling on coral reefs (12-14), they form intimate associations with the coral reef  
73 benthos (15-17), and they contribute significantly to host health and ecosystem  
74 homeostasis (18-20). The constant amendment of microbial communities to exploit  
75 available resources (21) can trigger differential abundances of specific  
76 microorganisms, hence shifts in community composition can provide an early  
77 indication of environmental change (22). For example, compositional and functional  
78 shifts of coral-associated microbial communities have been described along  
79 gradients of anthropogenic impact (23-25) and with changes in water quality (26).  
80 However, despite having many of the useful characteristics required of  
81 environmental indicators (9, 27), the diagnostic potential of microorganisms for coral  
82 reef monitoring is largely conceptual, with only a few studies elaborating on their  
83 potential value. For example, the 'microbialisation score' measures human impacts  
84 on coral reefs based on the ratio of microbial and fish metabolic rates (28). The main  
85 limitations to further develop and apply microbial-based monitoring approaches are  
86 the lack of temporal and spatial baselines for coral reef microbiomes (9, 29).

87           Coral reefs comprise a complex network of free-living and host-associated  
88 microbial communities with strong benthic-pelagic exchange (13, 30). Therefore,  
89 holistic assessments that combine different reef hosts and habitats are required to  
90 better understand microbial dynamics and sensitivities to environmental  
91 perturbations. The diagnostic value of microbial-based monitoring is likely to vary  
92 between distinct habitats of a coral reef ecosystem. For example, microbial  
93 communities occurring in seawater may be directly affected by the quality of the  
94 ambient reef water or climate conditions, however, the high heterogeneity of

95 seawater due to local hot-spots of available resources (31, 32) may diminish the  
96 specificity of these communities. In contrast, microbial communities that dwell in  
97 corals live in tight association with the most important frame-builders of reefs (29)  
98 and hence may provide crucial information not only on the environmental conditions  
99 but also on the effect of the environment on the coral host itself. Sponges, a highly  
100 abundant and diverse component of coral reefs (33), are renowned for their  
101 enormous filtration capacity (34) and form diverse and intimate associations with  
102 microbial communities (35). Hence, sponge microbiomes may provide suitable  
103 indicators to monitor water quality. Host-associated biofilms, such as those inhabiting  
104 the mucus layer of corals and the surface of macroalgae, provide another potential  
105 niche habitat informative for microbial indicators of environmental state. Coral  
106 mucus, for example, has been described as a suitable habitat to screen for  
107 enterobacteria from sewage contamination due to its ability to trap bacteria (36).

108         Given the complexity of microbial life on coral reefs we sought to identify the  
109 most suitable reef microbiomes for a microbial indicator program to pinpoint  
110 environmental state. To do this we quantified the 1) habitat-specificity, 2)  
111 determinacy of microbial community successions and 3) sensitivity towards  
112 environmental parameters of multiple free-living and host-associated microbiomes.  
113 Subsequently, we tested the microbiome's ability to infer environmental state using  
114 indicator value (37) and machine learning approaches (38).

115

## 116 **Results**

117 Samples were collected during a 16-month period (February 2016 - May 2017), at  
118 monthly (Magnetic Island - Geoffrey Bay) and seasonal (Orpheus Island – Pioneer  
119 Bay – Channel) intervals. The bacterial 16S rRNA genes of 381 samples including  
120 seawater, sediment, sponge tissue (*Coscinoderma matthewsi* and *Amphimedon*  
121 *queenslandica*), coral tissue and mucus (*Acropora tenuis* and *Acropora millepora*),  
122 and macroalgal surfaces (*Sargassum sp.*) were sequenced (Figure 1). In total  
123 231,316 zero-radius operational taxonomic units (zOTUs) were identified based on  
124 100% sequence similarity (39).

125

### 126 **Coral reef microbiomes are habitat-specific**

127 Habitat-specificity of coral reef microbes was assessed by comparing the similarities  
128 of microbial communities associated with seawater (n=48), sediment (n=48), *A.*  
129 *queenslandica* (n=30), *C. matthewsi* (n=42), *A. tenuis* (tissue n=48, mucus n=46), *A.*  
130 *millepora* (tissue n=42, mucus n=42) and *Sargassum sp.* (n=35). Non-metric  
131 Multidimensional Scaling based on Bray-Curtis dissimilarities revealed a clear  
132 separation of the microbial communities from different reef habitats (Figure 1), and  
133 habitat-specificity was further confirmed with Permutational Multivariate Analysis of  
134 Variance (PERMANOVA,  $p = 9.999 \times 10^{-5}$ , Table Supplementary Table 1-2).  
135 Furthermore, alpha diversities (ANOVA,  $F_{(8/372)} = 142$ ,  $p < 2 \times 10^{-16}$ ) and zOTU  
136 richness (ANOVA,  $F_{(8/372)} = 369$ ,  $p < 2 \times 10^{-16}$ ) varied significantly between reef  
137 habitats (Supplementary Figure 1 and Supplementary Table 3-5). Sediment  
138 harboured by far the most diverse (Shannon Index  $7.4 \pm 0.2$  SD) bacterial  
139 community, although microbial diversity was also high in coral surface mucus  
140 (Shannon Index  $5.1 \pm 0.9$  SD), macroalgal biofilms (Shannon Index  $4.5 \pm 1.4$  SD),  
141 seawater (Shannon Index  $4.4 \pm 0.2$  SD) and in the tissue of the sponge *C. matthewsi*

142 (Shannon Index  $4.4 \pm 0.3$  SD). Microbial diversity was lowest in coral tissue  
143 (Shannon Index  $3.3 \pm 0.8$  SD) and in the sponge *A. queenslandica* (Shannon Index  
144  $2.7 \pm 0.8$  SD). These results suggest overall high habitat-specificity of free-living and  
145 host-associated microbial communities within coral reef ecosystems.

146

### 147 **Uniform vs variable community assembly pattern**

148 The uniformity *versus* variability of microbial community assembly patterns was  
149 explored through comparison of compositional similarity (Bray-Curtis index, 0 =  
150 dissimilar, 1 = identical) in samples collected monthly at Geoffrey Bay (Magnetic  
151 Island). The microbial communities of seawater ( $n = 30$ , Wilcoxon Rank-Sum test  $p =$   
152  $3.1 \times 10^{-7}$ ) and sediment ( $n = 30$ ; Wilcoxon Rank-Sum test  $p = 3 \times 10^{-5}$ ) had  
153 significantly higher similarities “within” than “among” sampling events (Figure 2a).  
154 This uniform response of the free-living microbial communities suggests that  
155 deterministic rather than stochastic processes drive their community assembly. For  
156 host-associated microbiomes, the overall response pattern varied between species.  
157 Microbial communities associated with the sponge *C. matthewsi* ( $n = 27$ ; Wilcoxon  
158 Rank-Sum test,  $p = 0.0076$ ), the coral *A. tenuis* (mucus  $n = 28$ , tissue  $n = 30$ ;  
159 Wilcoxon Rank-Sum test,  $p = 0.0041$  and  $p = 0.0096$ , respectively) and the  
160 macroalga *Sargassum sp.* ( $n = 30$ ; Wilcoxon Rank-Sum test,  $p = 0.00013$ ) followed  
161 the same trend as the free-living communities, with significantly higher similarities  
162 “within” than “among” sampling events (Figure 2a). In contrast, the microbiome of the  
163 sponge *A. queenslandica* ( $n = 30$ ; Wilcoxon Rank-Sum test,  $p = 0.23$ ) and the coral  
164 *A. millepora* (mucus  $n = 24$ , tissue  $n = 24$ ; Wilcoxon Rank-Sum test,  $p = 0.15$  and  $p =$   
165  $0.11$  respectively) showed no significant difference in similarities “within” and  
166 “among” time points (Figure 2a). Analysis of the compositional similarity of sample

167 replicates within each sampling time point indicated that the seawater microbial  
168 communities not only exhibit an overall higher similarity “within” replicates, but the  
169 high compositional similarity is conserved across all sampling events (Figure 2b). In  
170 contrast, host-associated microbial communities showed a generally lower  
171 compositional similarity and higher variation between sample replicates within each  
172 sampling time point (Figure 2b).

173 Trends in the temporal community assembly pattern of free-living, host tissue-  
174 and biofilm-associated microbial communities were analysed using Analysis of  
175 Similarity (ANOSIM) as a proxy to describe similarity patterns ( $R = 0$  indicates equal  
176 similarity “within” and “among” time point replicates and  $R = 1$  indicates higher  
177 “within” than “among” sampling time point similarities; Figure 2b and Supplementary  
178 Figure 2). Overall, free-living microbiomes had  $R$  values closer to 1 (seawater  $R =$   
179  $0.9919$  and sediment  $R = 0.7322$ ), whereas host tissue-associated microbiomes had  
180  $R$  values closer to 0 (*A. queenslandica*  $R = 0.2927$ , *C. matthewsi*  $R = 0.3449$ , *A.*  
181 *tenuis* tissue  $R = 0.4547$  and *A. millepora* tissue  $R = 0.2151$ ). Host biofilm-associated  
182 microbiomes showed  $R$  values of approximately 0.5 (*A. tenuis* mucus  $R = 0.4613$  *A.*  
183 *millepora* mucus  $R = 0.3090$  and *Sargassum sp.* biofilm  $R = 0.4440$ ). These results  
184 suggest that free-living microbiomes (seawater and sediment) exhibit a uniform  
185 compositional succession, whereas host-associated microbiomes (coral, sponge and  
186 macroalgae) are more stochastic in their temporal community succession.  
187 Interestingly, host biofilm-associated microbiomes exhibited a higher uniformity  
188 (higher ANOSIM  $R$  values) in temporal community succession than tissue-  
189 associated microbiomes, most likely reflecting greater environmental influence. The  
190 uniform temporal response of free-living microbiomes suggests a high diagnostic



191 value of these microbial communities; hence seawater and sediment microbiomes  
192 should provide an accurate prediction of environmental variables.

193 Microbiomes in seawater (n=48) and sediment (n=48) were further tested for  
194 their compositional similarity between all three sampling sites (Geoffrey Bay, Pioneer  
195 Bay and Channel). The microbial community composition of sediment samples  
196 varied significantly between all three sampling sites (PERMANOVA,  $p = 9.999 \times 10^{-5}$ ,  
197 10,000 permutations; Supplementary Figure 3a). The seawater microbiome, in  
198 contrast, showed high temporal variability (ANOSIM  $R = 0.9934$ ,  $p = 0.001$ ) and low  
199 spatial variability (ANOSIM  $R = 0.2343$ ,  $p = 0.002$ ; Supplementary Figure 3b). The  
200 high spatial variability of sediment microbiomes indicates that habitat characteristics  
201 rather than environmental fluctuations are the main drivers structuring community  
202 composition.

203

#### 204 **Environmental sensitivity**

205 Environmental sensitivity of the different microbiomes was assessed by comparing  
206 how much of the compositional variation was explained by sea surface temperature,  
207 light and water quality parameters (Supplementary Figures 4 and 5). The  
208 compositional variability of the seawater microbiome (n=30) was significantly  
209 explained by sampling date, season (summer versus winter) and water quality  
210 parameters, such as average seawater temperature, average hours of daylight, total  
211 suspended solids (TSS), particulate organic carbon (POC), Chlorophyll a (Chl a),  
212 and non-purgeable organic carbon (NPOC) concentration (PERMANOVA for Bray  
213 Curtis distance based Redundancy Analysis (dbRDA); Figure 3a and Supplementary  
214 Table 6a-b). In total, these parameters explained 66% of the observed compositional  
215 variation in seawater, with 56% being significantly explained by environmental

216 variables (Variation Partitioning Analysis, Figure 3b). Season (summer *versus*  
217 winter) and sampling date explained 6% and 4%, respectively (Variation Partitioning  
218 Analysis, Figure 3b). In comparison, sampling site significantly explained 24% of the  
219 variation in sediment microbial communities (n=48), which overlapped by 12% with  
220 the variation explained by sediment characteristics, such as particle size and total  
221 organic carbon (TOC) content (PERMANOVA for dbRDA and Variation Partitioning  
222 Analysis; Supplementary Table 6b and 7). Water quality parameters and sea surface  
223 temperature explained only 3% of the observed variability in the sediment  
224 microbiome (Variation Partitioning Analysis).

225 Host-associated microbiomes varied substantially in their response to  
226 environmental parameters (PERMANOVA for dbRDA and Variation Partitioning  
227 Analysis, Figure 3b-c, Supplementary Table 6c-i and 7). On average, 11% of the  
228 observed community variations in host-associated microbiomes were explained by  
229 the environment, which is five-times less than what we found for the seawater  
230 associated microbial community (Supplementary Table 7). This suggests that  
231 compositional variations of the seawater microbiome are more likely to reflect  
232 environmental changes. Host-associated microbiomes, are comparatively stable to  
233 changes in environmental factors.

234

### 235 **Predictability of environmental metadata**

236 Due to the seawater microbiomes uniform temporal pattern and high sensitivity to  
237 changing environmental parameters, the ability to infer environmental state based on  
238 microbial community data was tested using an Indicator Value analysis (37) and a  
239 Random Forest machine learning approach. In total, 110 zOTUs were identified as  
240 significant indicators for temperature (Indicator Value  $p < 0.01$ ). Microbial zOTU

241 assemblages that were indicative of high, low and average seawater temperatures  
242 (classification based on their variation around observed annual averages) were  
243 present throughout the sampling period. However, higher relative abundances and  
244 lower variation (as calculated by coefficient of variation) were evident at certain time  
245 points (Figure 4a). Furthermore, we were able to identify microbial indicator taxa for  
246 high and low Chl *a*, TSS and POC levels (Supplementary Material Figure 6).  
247 Indicators for low and high seawater temperatures were identified in the bacterial  
248 phyla Proteobacteria, Bacteroidetes, Cyanobacteria, Actinobacteria and  
249 Planctomycetes (Figure 4b). High temperatures were indicated by an increase of  
250 zOTUs belonging to the bacterial family *Rhodobacteraceae* and the presence of  
251 *Cryomorphaceae*, *Synechococcaeae*, *Vibrio* and *Flavobacterium* (Figure 4b). In  
252 contrast, the occurrence of zOTUS belonging to the family *Pelagibacteriaceae* and  
253 the genus *Prochlorococcus* were indicative for low seawater temperatures. The  
254 phyla Proteobacteria, Bacteroidetes and Cyanobacteria had the greatest number of  
255 indicator zOTUs for temperature and other water quality parameters (Supplementary  
256 Figure 6). *Flavobacteriaceae*-affiliated zOTUs were significant indicators for  
257 temperature, Chl *a*, TSS and POC. *Halomonadaceae* significantly associated with  
258 high Chl *a* and TSS and zOTUs belonging to the phylum Verrucomicrobia were  
259 significant indicators for high TSS levels.

260 The diagnostic value of the seawater microbiome (n=48) was further  
261 evaluated by applying a Random Forest machine learning classification and  
262 regression analysis with 1,213 zOTUs preselected based on a non-zero abundance  
263 threshold in at least 10% of the samples (n=48). The seawater microbiome enabled  
264 the prediction of seawater temperature classes (low, average, high) with 92%  
265 accuracy (Kappa = 88%, Figure 5a-b and Supplementary Figure 7). Highest

266 accuracy (lowest Out of Bag (OOB) estimated error rate) was achieved with  $m_{\text{try}} =$   
267 100 zOTUS. Random Forest regression of the seawater microbiome predicted  
268 temperature values ( $R^2 = 0.67$ , RMSE = 0.5) (Figure 5c-d and Supplementary Figure  
269 8) with the highest accuracy (lowest OOB estimated error rate) when  $m_{\text{try}} = 400$   
270 zOTUs. The effectiveness of zOTUs in reducing uncertainty and variance (also  
271 referred to as 'feature importance') within the machine learning algorithm was  
272 measured by the decrease in mean accuracy for classification and mean-squared  
273 error (%incMSE) for regression. The most important zOTUs belong to the bacterial  
274 taxa *Flavobacteriaceae*, *Pelagibacteraceae*, Cyanobacteria, *Rhodobacteraceae*,  
275 *Synechococcaceae* and *Pirrelulacae*. These results demonstrate that the microbial  
276 community associated with coral reef seawater allows for the accurate prediction of  
277 fluctuations in sea surface temperature and water quality parameters.

278

## 279 **Discussion**

280 Sensitive and rapidly responding markers of coral ecosystem stress are needed to  
281 underpin effective management and restoration strategies. In this study, we used a  
282 range of statistical tests and machine learning approaches across multiple free-living  
283 and host-associated reef microbiomes to assess their diagnostic value as sensitive  
284 indicators of environmental state. Our results show that the microbial community in  
285 reef seawater has the highest diagnostic value when compared to other free-living  
286 (e.g. sediment) and host-associated microbiomes (e.g. coral, sponge and  
287 macroalgae). Our conclusion is based on the microbiome's 1) habitat-specificity, 2)  
288 uniformity of its community assembly, 3) sensitivity towards environmental  
289 fluctuations and 4) accuracy to predict environmental parameters. This assessment

290 of the diagnostic capacity of various free-living and host-associated coral reef  
291 microbiomes to extrapolate environmental variations provides crucial information for  
292 ecosystem management initiatives aimed at incorporating microbial monitoring.

293 In general, high habitat-specificity was observed across free-living and host-  
294 associated microbiomes, confirming previous reports on the compositional variability  
295 of microbial communities between coral reef habitats (40), host species (15, 41-43)  
296 and even between host compartments (44). High compositional divergence of  
297 microbial communities across different reef habitats can be due to the variation of  
298 available resources and/or biotic interactions (21). High habitat-specificity contributes  
299 to the overall high diversity and complexity across different microbial communities on  
300 coral reefs, highlighting the importance of holistic studies that focus on microbial  
301 interactions across the benthic-pelagic realm.

302 Bacterial community structure associated with water and sediment is thought  
303 to be primarily governed by deterministic processes (45). Our results are consistent  
304 with this, showing uniform community assembly patterns within time point replicates.  
305 In contrast, host-associated microbiomes displayed little compositional similarity  
306 within a sampling time point, suggesting a non-uniform temporal response. Host-  
307 associated microbiomes were also only marginally affected by environmental  
308 parameters, indicating that their community assembly pattern are variable between  
309 conspecific individuals (45). A higher variability in community assembly can lead to  
310 increased community heterogeneity, also referred to as dispersion, which has been  
311 described as a common characteristic of host-associated microbiomes (18, 46-48).  
312 Furthermore, lower microbial compositional similarities amongst replicates may be  
313 driven by increased niche space (e.g. host compartments) (44) and host genotype  
314 effects (e.g. host genetics) (42). Collectively, our results show that free-living

315 microbial communities have a higher potential to infer environmental parameters  
316 (such as standard measures in environmental monitoring programs) than host-  
317 associated microbial communities due to their higher uniformity and environmental  
318 sensitivity. Importantly however, previous metaproteomic research on reef sponges  
319 has shown that while microbial community composition can appear stable when  
320 seawater temperatures increase, disruption to nutritional interdependence and  
321 molecular interactions (such as reduced expression of transporters involved in the  
322 uptake of sugars, peptides and other substrates) actually occurs prior to detectable  
323 changes in community structure (49). Hence, considering the importance of  
324 microbes to reef invertebrate health, more sensitive transcriptomic / proteomic  
325 approaches may still be warranted for sensitive detection of microbial responses to  
326 environmental perturbations.

327         The diagnostic potential of microbial communities, especially in combination  
328 with machine learning approaches, has gained momentum across multiple research  
329 fields, including disease identification by characterisation of the human gut-  
330 microbiome (50), evaluation of the environment and host genetics on the human  
331 microbiome (51), prediction of hydrological functions in riverine ecosystems (52) and  
332 assessment of macroecological patterns in soil samples (53). This development of  
333 microbial-based diagnostics is largely due to availability of high-throughput  
334 sequencing of the 16S rRNA gene and streamlined analytical pipelines that facilitate  
335 rapid assessment of microbial community composition (54, 55). In addition to its  
336 utility for inferring environmental fluctuations, the seawater microbiome possesses  
337 numerous characteristics desirable for environmental monitoring programs: i) non-  
338 destructive collection and simple processing methods facilitate large-scale  
339 collections alongside existing programs that sample water quality measurements, ii)

340 high fractional contribution of abundant microbes minimises the impacts of  
341 sequencing biases (Supplementary Figure 9) and iii) sampling is conducive to future  
342 automated, high throughput analyses such as in-line flow cytometry on vessels and  
343 real-time DNA/RNA sequencing for community characterisation.

344         Incorporation of seawater microbial community data into coral reef monitoring  
345 approaches should enhance our ability to describe environmental conditions and  
346 changes more holistically. For example, temperature fluctuations drive structural  
347 variations in seawater microbial communities (56, 57), and elevated seawater  
348 temperatures on coral reefs are highly correlated with coral bleaching (1, 58). The  
349 inclusion of microbial community data alongside water quality parameters could  
350 therefore improve our ability to predict the likelihood of ecosystem stress. For  
351 instance, our sample sites, located in the central sector of the GBR, were not  
352 affected by the 2016 bleaching that primarily affected the northern sector (59),  
353 however they were impacted by the 2017 bleaching event (60). In the months prior to  
354 bleaching (late December 2016 till March 2017) we observed two to four times  
355 higher relative abundances of high temperature indicator assemblages than when  
356 compared to the equivalent period at the beginning of 2016 (Figure 4a), where no  
357 bleaching was observed. Interestingly, high temperature indicator assemblages  
358 included putative coral pathogens (e.g. *Vibrio*) and opportunistic bacteria (e.g.  
359 Rhodobacteraceae, *Verrucomicrobia* and *Flavobacterium*). Coral pathogens, such as  
360 *Vibrio corallilyticus* increase their efficiency and motility behaviours with rising  
361 seawater temperatures (61-63), and the higher abundance of these microbes may  
362 explain the increased prevalence of coral disease post bleaching (64). Hence,  
363 microbial monitoring could help inform managers about impending disease  
364 outbreaks.

365           While microbial inventories for reef biofilms and seawater have been  
366 established within the Red Sea (57) and Florida coastal areas (65), our study  
367 provides the first holistic microbial baseline spanning multiple free-living and host-  
368 associated microbiomes for selected GBR sites. Results suggest that there is  
369 realistic scope to enhance long-term reef monitoring initiatives by incorporating  
370 seawater microbiome observations for assessments of environmental change over  
371 space and time, especially for rapid and sensitive identification of early signs of  
372 declining ecosystem health. The establishment of microbial observatories (66) and  
373 DNA biobanks for long-term biomonitoring (67) will be paramount to successfully  
374 inferring ecosystem state and / or perturbations from microbial communities. We  
375 therefore recommend timely integration of microbial sampling into current coral reef  
376 monitoring initiatives. Further refinement of the sampling and data analysis  
377 techniques should focus on selection and validation of additional indicator taxa as  
378 well as assessment of ecologically important microbial functions. A further  
379 consideration is to explore which monitoring objectives would benefit most from  
380 assessments of microbial communities. For example, it is likely that the rapid  
381 response time of microbial indicators makes them better suited to early-warning,  
382 impact or compliance monitoring programs than to monitoring of slower, long-term  
383 changes.

384

## 385 **Materials and Methods**

### 386 **Sample collection**

387 Samples for microbial community characterization were collected monthly (Magnetic  
388 Island) and seasonally (Orpheus Island) from seawater, sediment and multiple host



389 organisms (i.e. corals, sponges and macroalgae), along with environmental  
390 metadata, between February 2016 and May 2017 at three Great Barrier Reef sites  
391 (Figure 1). Samples were collected under the permit G16/38348.1 issued by the  
392 Great Barrier Reef Marine Park Authority.

393 Samples (n= 3/ sample type/ sampling event) for molecular analysis and  
394 additional environmental metadata were collected following the standard operational  
395 procedures of the Australian Marine Microbial Biodiversity Initiative (AMMBI;  
396 <https://data.bioplatforms.com/organization/pages/australian-microbiome/methods>). In  
397 brief, seawater for molecular analysis was collected with collapsible sterile bags  
398 close to the reef substrate at 2 m depth and pre-filtered (50 µm) to remove large  
399 particles and subsequently filtered (2 L) onto 0.2 µm Sterivex-filters (Millepore). The  
400 sediment surface layer was sampled with sterile 50 mL tubes at 2 m depth and  
401 subsampled immediately into 2 mL cryogenic vials. The sponges *Coscinoderma*  
402 *matthewsi* and *Amphimedon queenslandica* were removed from the substrate (at 7  
403 m and 3 m respectively) with sterile scalpel blades, rinsed with 0.2 µm filter-sterilised  
404 seawater and subsampled into 2 mL cryogenic vials. The surface mucus layer of the  
405 two acroporid coral species, *Acropora tenuis* and *Acropora millepora*, was sampled  
406 with sterile cotton swabs (18). Additionally, coral fragments of each sampled coral  
407 were collected at 3 m depth. Coral fragments were rinsed with 0.2 µm filtered-  
408 sterilised seawater and placed into 5 mL cryogenic vials. The thallus (including stem,  
409 floats and blades) of the macroalgae *Sargassum sp.* was sampled with sterile  
410 scalpels at 3 m depth, rinsed with 0.2 µm filtered-sterilised seawater and placed into  
411 2 mL cryogenic vials. All samples were immediately flash frozen in liquid nitrogen  
412 after processing and stored at -80°C until DNA extraction.

413 Additional seawater samples were collected with a diver-operated Niskin  
414 bottle close to the reef substrate at 2 m depth at each sampling occasion. Water was  
415 subsampled in duplicate for analyses of salinity and concentrations of dissolved  
416 organic carbon (DOC), dissolved inorganic carbon (DIC), particulate organic carbon  
417 (POC), dissolved inorganic nutrients (DIN), total suspended solids (TSS) and  
418 chlorophyll a (Chl a) concentration. Samples were further analysed according to the  
419 standard procedures of the Australian Institute of Marine Science (AIMS, Townsville,  
420 Australia)(68). Sediment samples were collected with 100 ml glass jars at 2 m depth  
421 and characteristics, such as grain size distribution and total organic carbon (TOC)  
422 and nitrogen (TON) content, were assessed for each sampling event. Seawater  
423 temperatures were obtained from AIMS long-term monitoring temperature records  
424 (<http://eatlas.org.au/>).

425

#### 426 **DNA extraction**

427 Prior to extraction, the macroalgal biofilm was separated from the algal tissue by  
428 overnight incubation at 200 rpm in 10 mL 1 x PBS at 37°C. Coral fragments were  
429 defrosted on ice and the tissue was stripped from the skeleton with an airgun into 1 x  
430 PBS solution, homogenised for 1 min at 12.5 rpm with a tissue homogeniser,  
431 pelleted (10 min at 16,000 rcf) and snap frozen in liquid nitrogen prior to DNA  
432 extraction. DNA from seawater, sediment, sponge and macroalgal biofilms was  
433 extracted with the DNeasy PowerSoil kit (Qiagen) and DNA of coral tissue and  
434 mucus samples was extracted using the DNeasy PowerBiofilm kit (Qiagen) following  
435 the Manufacturer's instructions. DNA extracts were stored at -80°C until being sent  
436 for sequencing.

437

## 438 **16S rRNA gene sequencing**

439 DNA extracts were sent on dry ice to the Ramaciotti Centre for Genomics (Sydney,  
440 Australia) for sequencing. The bacterial 16S rRNA genes were sequenced using the  
441 27F (69) and 519R (70) primer pairs on the Illumina MiSeq platform utilising a dual  
442 indexed 2 x 300 bp paired end approach. Further documentation outlining the  
443 standard operating procedures for generating and sequencing amplicons is available  
444 at <https://data.bioplatforms.com/organization/pages/bpa-marine-microbes/methods>.

445

## 446 **Sequence analysis**

447 Sequencing data were analysed as single nucleotide variants in a standardized  
448 platform alongside other Australian microbial biodiversity initiative samples (39, 71).  
449 In brief, forward and reverse reads were merged using FLASH (72). FASTA  
450 formatted sequences were extracted from FASTQ files and those < 400 bp in length  
451 or containing N's or homopolymer runs of > 8 bp were removed using MOTHUR  
452 (v1.34.1) (73). USEARCH (64 bit v10.0.240) (74) package was used to de-replicate  
453 sequences and to order them by abundance. Sequences with < 4 representatives  
454 and Chimeras were removed. Quality-filtered sequences were mapped to chimera-  
455 free zero-radius operational taxonomic units (zOTUs) and a sample by read  
456 abundance table created. zOTUs were taxonomically classified with SILVA v132 (75)  
457 database using MOTHUR's implementation of the Wang classifier (76) and a 60%  
458 Bayesian probability cut-off.

459 Chloroplast and mitochondria derived reads as well as singletons were  
460 removed from the dataset. Remaining data were rarefied to 3,600 reads per sample  
461 and transformed to relative abundances using the phyloseq package (77) in R (78).

462

### 463 **Habitat and host-specificity**

464 Habitat and host-specificity of a microbiome was assessed by calculating the  
465 compositional similarities of all 381 samples with the Bray-Curtis Index and  
466 illustrating them in a Non-Metric Multidimensional Scaling (NMDS) plot using the  
467 phyloseq package (77). To confirm habitat and host-specificity, Permutational  
468 Multivariate Analysis of Variance (PERMANOVA) was applied using the adonis()  
469 function of the vegan package (79) with 10,000 permutations.

470

### 471 **Uniform response pattern**

472 The microbiome similarity of replicates for sampling time points *versus* the  
473 microbiome similarity among sampling time points was compared by obtaining the  
474 Bray-Curtis Similarity for each habitat individually. The variation between the overall  
475 within and among time point replicates was tested with a Wilcoxon Rank-sum test in  
476 R (78). The dispersion of the Bray-Curtis similarities within a sampling time point was  
477 calculated as the coefficient of variation. Analysis of Similarity (ANOSIM; anosim())  
478 function of the vegan package (79)) based on Bray-Curtis similarities was used to  
479 further evaluate within and among time point similarities in the microbial  
480 communities.

481

### 482 **Environmental sensitivities**

483 Environmental metadata were z-score standardized (80) and checked for collinearity  
484 using the Pearson correlation coefficient. Collinearity was assumed if correlation was  
485  $> 0.7$  or  $< -0.7$  (81). Collinear variables were considered redundant and removed  
486 from the analysis.

487 zOTU relative abundance, environmental metadata (e.g. average seawater  
488 temperature, average hours of daylight, Chl a, POC, NPOC and TSS concentration),  
489 season (summer *versus* winter) and sampling date were used for Bray-Curtis  
490 distance-based redundancy analysis (db-RDA) using the phyloseq package (77).  
491 The significance of each response variable was confirmed with an Analysis of  
492 Variance (ANOVA) for the db-RDA (anova.cca() function in the vegan package (79)).  
493 Only significant (p-value < 0.05) response variables were kept in the model. The  
494 explanatory value (in %) of significant response variables (e.g. environmental  
495 parameters, season and sampling date) was assessed with a Variation Partitioning  
496 Analysis of the vegan package (79).

497

#### 498 **Indicator value analysis**

499 Indicator taxa were identified with the indicator value analysis (indicspecies package  
500 (37)) using the following thresholds: 1,000 permutations, minimum specificity (At)  
501 and minimum sensitivity (Bt) set to 70% and p-value  $\leq 0.01$ .

502

#### 503 **Random forest machine learning**

504 Random forest machine learning was performed with the caret (82) and random  
505 forest package (83) in R (78). zOTUs with non-zero abundance values in at least  
506 10% of the samples (n=48) were preselected and z-score standardised prior to  
507 model training. Random Forest (with  $n_{\text{tress}} = 10,000$ ) prediction error was measured  
508 with out-of-bag (OOB) error. Highest accuracy (lowest OOB estimated error rate) for  
509 classification was achieved with  $m_{\text{try}} = 100$  zOTUS and for regression with  $m_{\text{try}} = 400$   
510 zOTUs. Importance of zOTUs was measured using the decrease in mean accuracy  
511 for classification and mean-squared error (%incMSE) for regression.

512

### 513 **Data availability**

514 Sequencing data, metadata and protocols are available at the Bioplatforms Australia  
515 data portal under the Australian Microbiome project ([www.data.bioplatforms.com](http://www.data.bioplatforms.com)).  
516 Full usage requires free registration. To search for the sequencing data, navigate to  
517 “Processed data”, select “Amplicon is 27f519r\_bacteria” and “Environment is  
518 Marine”. To search for the Great Barrier Reef sampling sites, add an additional  
519 contextual filter, select “Sampling Site” from the dropdown menu and search for  
520 “Geoffrey Bay”, “Pionner Bay” and “Channel”.

521

### 522 **Acknowledgements**

523 We thank Michele Skuza, Neale Johnston and the AIMS water quality team for their  
524 help with analysing the water quality samples. We also thank Heidi Luter, Katarina  
525 Damjanovic and Joe Gioffre for their assistance in the field and Sara Bell for her  
526 expertise in the laboratory. We would like to acknowledge the contribution of the  
527 Marine Microbes (MM) and Biomes of Australian Soil Environments (BASE) projects,  
528 through the Australian Microbiome Initiative in the generation of data used in this  
529 publication. The Australian Microbiome Initiative is supported by funding from  
530 Bioplatforms Australia through the Australian Government National Collaborative  
531 Research Infrastructure Strategy (NCRIS). The study was further funded by the  
532 Advance Queensland PhD Scholarship, the Great Barrier Reef Marine Park Authority  
533 Management Award and a National Environmental Science Program (NESP) grant  
534 awarded to B.G.

535

536 **Author contributions**

537 Samples were collected by B.G., D.G.B., P.R.F. and N.S.W. Samples were  
538 processed in the laboratory by B.G. and P.R.F. B.G. analysed and prepared the  
539 manuscript. All authors reviewed and edited the manuscript.

540

541 **References**

- 542 1. Hughes TP, Barnes ML, Bellwood DR, Cinner JE, Cumming GS, Jackson  
543 JBC, Kleypas J, van de Leemput IA, Lough JM, Morrison TH, Palumbi SR,  
544 van Nes EH, Scheffer M. 2017. Coral reefs in the Anthropocene. *Nature*  
545 546:82-90.
- 546 2. De'ath G, Fabricius KE, Sweatman H, Puotinen M. 2012. The 27-year decline  
547 of coral cover on the Great Barrier Reef and its causes. *Proceedings of the*  
548 *National Academy of Sciences of the United States of America* 109:17995-  
549 17999.
- 550 3. Hoegh-Guldberg O, Mumby PJ, Hooten AJ, Steneck RS, Greenfield P,  
551 Gomez E, Harvell CD, Sale PF, Edwards AJ, Caldeira K, Knowlton N, Eakin  
552 CM, Iglesias-Prieto R, Muthiga N, Bradbury RH, Dubi A, Hatziolos ME. 2007.  
553 *Coral Reefs Under Rapid Climate Change and Ocean Acidification. Science*  
554 318:1737-1742.
- 555 4. Hughes TP, Kerry JT, Baird AH, Connolly SR, Dietzel A, Eakin CM, Heron SF,  
556 Hoey AS, Hoogenboom MO, Liu G, McWilliam MJ, Pears RJ, Pratchett MS,  
557 Skirving WJ, Stella JS, Torda G. 2018. Global warming transforms coral reef  
558 assemblages. *Nature* 556:492-496.

- 559 5. van Hooijdonk R, Maynard J, Tamelander J, Gove J, Ahmadiya G, Raymundo  
560 L, Williams G, Heron SF, Planes S. 2016. Local-scale projections of coral reef  
561 futures and implications of the Paris Agreement. *Sci Rep* 6:39666.
- 562 6. Hughes TP, Anderson KD, Connolly SR, Heron SF, Kerry JT, Lough JM,  
563 Baird AH, Baum JK, Berumen ML, Bridge TC, Claar DC, Eakin CM, Gilmour  
564 JP, Graham NAJ, Harrison H, Hobbs JA, Hoey AS, Hoogenboom M, Lowe  
565 RJ, McCulloch MT, Pandolfi JM, Pratchett M, Schoepf V, Torda G, Wilson SK.  
566 2018. Spatial and temporal patterns of mass bleaching of corals in the  
567 Anthropocene. *Science* 359:80-83.
- 568 7. Anthony K, Bay LK, Costanza R, Firn J, Gunn J, Harrison P, Heyward A,  
569 Lundgren P, Mead D, Moore T, Mumby PJ, van Oppen MJH, Robertson J,  
570 Runge MC, Suggett DJ, Schaffelke B, Wachenfeld D, Walshe T. 2017. New  
571 interventions are needed to save coral reefs. *Nat Ecol Evol* 1:1420-1422.
- 572 8. Damjanovic K, Blackall LL, Webster NS, van Oppen MJH. 2017. The  
573 contribution of microbial biotechnology to mitigating coral reef degradation.  
574 *Microb Biotechnol* 10:1236-1243.
- 575 9. Glasl B, Webster NS, Bourne DG. 2017. Microbial indicators as a diagnostic  
576 tool for assessing water quality and climate stress in coral reef ecosystems.  
577 *Marine Biology* 164.
- 578 10. Glasl B, Bourne DG, Frade PR, Webster NS. 2018. Establishing microbial  
579 baselines to identify indicators of coral reef health. *Microbiology Australia*  
580 39:42-46.
- 581 11. Roitman S, Joseph Pollock F, Medina M. Coral Microbiomes as Bioindicators  
582 of Reef Health, p 1-19 doi:10.1007/13836\_2018\_29. Springer International  
583 Publishing, Cham.



- 584 12. Gast GJ, Wiegman S, Wieringa E, Duyl FCv, Bak RPM. 1998. Bacteria in  
585 coral reef water types: removal of cells, stimulation of growth and  
586 mineralization. *Mar Ecol Prog Ser* 167:37-45.
- 587 13. Bourne D, Webster N. 2013. Coral Reef Bacterial Communities, p 163-187. *In*  
588 Rosenberg E, DeLong E, Lory S, Stackebrandt E, Thompson F (ed), *The*  
589 *Prokaryotes* doi:10.1007/978-3-642-30123-0\_48. Springer Berlin Heidelberg.
- 590 14. Sorokin YI. 1973. Trophical role of bacteria in ecosystem of coral reef. *Nature*  
591 242:415-417.
- 592 15. Rohwer F, Seguritan V, Azam F, Knowlton N. 2002. Diversity and distribution  
593 of coral-associated bacteria. *Mar Ecol Prog Ser* 243:1-10.
- 594 16. Webster NS, Luter HM, Soo RM, Botte ES, Simister RL, Abdo D, Whalan S.  
595 2012. Same, same but different: symbiotic bacterial associations in GBR  
596 sponges. *Front Microbiol* 3:444.
- 597 17. Egan S, Harder T, Burke C, Steinberg P, Kjelleberg S, Thomas T. 2013. The  
598 seaweed holobiont: understanding seaweed–bacteria interactions. *FEMS*  
599 *Microbiol Rev* 37:462-476.
- 600 18. Glasl B, Herndl GJ, Frade PR. 2016. The microbiome of coral surface mucus  
601 has a key role in mediating holobiont health and survival upon disturbance.  
602 *ISME J* doi:10.1038/ismej.2016.9.
- 603 19. Hentschel U, Schmid M, Wagner M, Fieseler L, Gernert C, Hacker J. 2001.  
604 Isolation and phylogenetic analysis of bacteria with antimicrobial activities  
605 from the Mediterranean sponges *Aplysina aerophoba* and *Aplysina*  
606 *cavernicola*. *FEMS Microbiol Ecol* 35:305-312.
- 607 20. Webster NS, Reusch TBH. 2017. Microbial contributions to the persistence of  
608 coral reefs. *Isme Journal* 11:2167-2174.

- 609 21. Martiny JB, Jones SE, Lennon JT, Martiny AC. 2015. Microbiomes in light of  
610 traits: A phylogenetic perspective. *Science* 350:aac9323.
- 611 22. Garza DR, van Verk MC, Huynen MA, Dutilh BE. 2018. Towards predicting  
612 the environmental metabolome from metagenomics with a mechanistic model.  
613 *Nat Microbiol* 3:456-460.
- 614 23. Ziegler M, Roik A, Porter A, Zubier K, Mudarris MS, Ormond R, Voolstra CR.  
615 2016. Coral microbial community dynamics in response to anthropogenic  
616 impacts near a major city in the central Red Sea. *Mar Pollut Bull*  
617 doi:<http://dx.doi.org/10.1016/j.marpolbul.2015.12.045>.
- 618 24. Kelly LW, Williams GJ, Barott KL, Carlson CA, Dinsdale EA, Edwards RA,  
619 Haas AF, Haynes M, Lim YW, McDole T, Nelson CE, Sala E, Sandin SA,  
620 Smith JE, Vermeij MJA, Youle M, Rohwer F. 2014. Local genomic adaptation  
621 of coral reef-associated microbiomes to gradients of natural variability and  
622 anthropogenic stressors. *Proceedings of the National Academy of Sciences*  
623 111:10227-10232.
- 624 25. Dinsdale EA, Pantos O, Smriga S, Edwards RA, Angly F, Wegley L, Hatay M,  
625 Hall D, Brown E, Haynes M, Krause L, Sala E, Sandin SA, Thurber RV, Willis  
626 BL, Azam F, Knowlton N, Rohwer F. 2008. Microbial ecology of four coral  
627 atolls in the northern Line Islands. *PLoS ONE* 3:e 1584.
- 628 26. Angly FE, Heath C, Morgan TC, Tonin H, Rich V, Schaffelke B, Bourne DG,  
629 Tyson GW. 2016. Marine microbial communities of the Great Barrier Reef  
630 lagoon are influenced by riverine floodwaters and seasonal weather events.  
631 *PeerJ* 4:e1511.

- 632 27. Cooper TF, Gilmour JP, Fabricius KE. 2009. Bioindicators of changes in water  
633 quality on coral reefs: review and recommendations for monitoring  
634 programmes. *Coral Reefs* 28:589-606.
- 635 28. McDole T, Nulton J, Barott KL, Felts B, Hand C, Hatay M, Lee H, Nadon MO,  
636 Nosrat B, Salamon P, Bailey B, Sandin SA, Vargas-Angel B, Youle M,  
637 Zgliczynski BJ, Brainard RE, Rohwer F. 2012. Assessing coral reefs on a  
638 pacific-wide scale using the microbialization score. *Plos One* 7.
- 639 29. Bourne DG, Morrow KM, Webster NS. 2016. Coral Holobionts: Insights into  
640 the coral microbiome: Underpinning the health and resilience of reef  
641 ecosystems. *Annual Reviews of Microbiology* 70:317-340.
- 642 30. Lesser MP. 2006. Benthic-pelagic coupling on coral reefs: Feeding and  
643 growth of Caribbean sponges. *Journal of Experimental Marine Biology and*  
644 *Ecology* 328:277-288.
- 645 31. Azam F. 1998. Microbial control of oceanic carbon flux: the plot thickens.  
646 *Science* 280:694-696.
- 647 32. Stocker R. 2012. Marine microbes see a sea of gradients. *Science* 338:628-  
648 633.
- 649 33. Diaz MC, Rützler K. 2001. Sponges: an essential component of Caribbean  
650 coral reefs. *Bull Mar Sci* 69:535-546.
- 651 34. Reiswig HM. 1971. *In situ* pumping activities of tropical Demospongiae.  
652 *Marine Biology* 9:38-50.
- 653 35. Taylor MW, Radax R, Steger D, Wagner M. 2007. Sponge-associated  
654 microorganisms: evolution, ecology, and biotechnological potential.  
655 *Microbiology and Molecular Biology Reviews* 71:295-347.

- 656 36. Lipp EK, Griffin DW. 2004. Analysis of coral mucus as an improved medium  
657 for detection of enteric microbes and for determining patterns of sewage  
658 contamination in reef environments. *EcoHealth* 1:317-323.
- 659 37. De Cáceres M, Legendre P. 2009. Associations between species and groups  
660 of sites: indices and statistical inference. *Ecology* 90:3566-3574.
- 661 38. Knights D, Costello EK, Knight R. 2011. Supervised classification of human  
662 microbiota. *FEMS Microbiol Rev* 35:343-59.
- 663 39. Brown MV, Kamp Jvd, Ostrowski M, Seymour JR, Ingleton T, Messer LF,  
664 Jeffries T, Siboni N, Laverock B, Bibiloni-Isaksson J, Nelson TM, Coman F,  
665 Davies CH, Frampton D, Rayner M, Goossen K, Robert S, Holmes B, Abell  
666 GCJ, Craw P, Kahlke T, Sow SLS, McAllister K, Windsor J, Skuza M,  
667 Crossing R, Patten N, Malthouse P, Ruth PDv, Paulsen I, Fuhrman JA,  
668 Richardson A, Koval J, Bissett A, Fitzgerald A, Moltmann T, Bodrossy L. in  
669 press. Systematic, continental scale temporal monitoring of marine pelagic  
670 microbiota by the Australian Marine Microbial Biodiversity Initiative. *Scientific*  
671 *Data* SDATA-18-00035B.
- 672 40. Tout J, Jeffries TC, Webster NS, Stocker R, Ralph PJ, Seymour JR. 2014.  
673 Variability in Microbial Community Composition and Function Between  
674 Different Niches Within a Coral Reef. *Microb Ecol* 67:540-552.
- 675 41. Carlos C, Torres TT, Ottoboni LMM. 2013. Bacterial communities and  
676 species-specific associations with the mucus of Brazilian coral species. *Sci*  
677 *Rep* 3.
- 678 42. Glasl B, Smith CE, Bourne DG, Webster NS. 2018. Exploring the diversity-  
679 stability paradigm using sponge microbial communities. *Sci Rep* 8:8425.
- 680 43. Webster NS, Thomas T. 2016. The Sponge Hologenome. *MBio* 7.

- 681 44. Sweet MJ, Croquer A, Bythell JC. 2011. Bacterial assemblages differ between  
682 compartments within the coral holobiont. *Coral Reefs* 30:39-52.
- 683 45. Wang J, Shen J, Wu Y, Tu C, Soininen J, Stegen JC, He J, Liu X, Zhang L,  
684 Zhang E. 2013. Phylogenetic beta diversity in bacterial assemblages across  
685 ecosystems: deterministic versus stochastic processes. *ISME J* 7:1310-21.
- 686 46. Casey JM, Connolly SR, Ainsworth TD. 2015. Coral transplantation triggers  
687 shift in microbiome and promotion of coral disease associated potential  
688 pathogens. *Sci Rep* 5:11903.
- 689 47. Zaneveld JR, McMinds R, Thurber RV. 2017. Stress and stability: applying the  
690 Anna Karenina principle to animal microbiomes. *Nature Microbiology* 2.
- 691 48. Zaneveld JR, Burkepille DE, Shantz AA, Pritchard CE, McMinds R, Payet JP,  
692 RoryWelsh, Correa AMS, Lemoine NP, Rosales S, Fuchs C, Maynard JA,  
693 Thurber RV. 2016. Overfishing and nutrient pollution interact with temperature  
694 to disrupt coral reefs down to microbial scales. *Nature Communications*  
695 7:11833.
- 696 49. Fan L, Liu M, Simister R, Webster NS, Thomas T. 2013. Marine microbial  
697 symbiosis heats up: the phylogenetic and functional response of a sponge  
698 holobiont to thermal stress. *ISME J* 7:991-1002.
- 699 50. Duvallet C, Gibbons SM, Gurry T, Irizarry RA, Alm EJ. 2017. Meta-analysis of  
700 gut microbiome studies identifies disease-specific and shared responses. *Nat*  
701 *Commun* 8:1784.
- 702 51. Rothschild D, Weissbrod O, Barkan E, Kurilshikov A, Korem T, Zeevi D,  
703 Costea PI, Godneva A, Kalka IN, Bar N, Shilo S, Lador D, Vila AV, Zmora N,  
704 Pevsner-Fischer M, Israeli D, Kosower N, Malka G, Wolf BC, Avnit-Sagi T,  
705 Lotan-Pompan M, Weinberger A, Halpern Z, Carmi S, Fu J, Wijmenga C,

- 706 Zhernakova A, Elinav E, Segal E. 2018. Environment dominates over host  
707 genetics in shaping human gut microbiota. *Nature* 555:210-215.
- 708 52. Good SP, URycki DR, Crump BC. 2018. Predicting hydrologic function with  
709 aquatic gene fragments. *Water Resources Research* 54:2424-2435.
- 710 53. Ramirez KS, Knight CG, de Hollander M, Brearley FQ, Constantinides B,  
711 Cotton A, Creer S, Crowther TW, Davison J, Delgado-Baquerizo M, Dorrepaal  
712 E, Elliott DR, Fox G, Griffiths RI, Hale C, Hartman K, Houlden A, Jones DL,  
713 Krab EJ, Maestre FT, McGuire KL, Monteux S, Orr CH, van der Putten WH,  
714 Roberts IS, Robinson DA, Rocca JD, Rowntree J, Schlaeppli K, Shepherd M,  
715 Singh BK, Straathof AL, Bhatnagar JM, Thion C, van der Heijden MGA, de  
716 Vries FT. 2018. Detecting macroecological patterns in bacterial communities  
717 across independent studies of global soils. *Nat Microbiol* 3:189-196.
- 718 54. Schuster SC. 2008. Next-generation sequencing transforms today's biology.  
719 *Nat Methods* 5:16-8.
- 720 55. Waldor MK, Tyson G, Borenstein E, Ochman H, Moeller A, Finlay BB, Kong  
721 HH, Gordon JI, Nelson KE, Dabbagh K, Smith H. 2015. Where next for  
722 microbiome research? *PLoS Biol* 13:e1002050.
- 723 56. Sunagawa S, Coelho LP, Chaffron S, Kultima JR, Labadie K, Salazar G,  
724 Djahanschiri B, Zeller G, Mende DR, Alberti A, Cornejo-Castillo FM, Costea  
725 PI, Cruaud C, d'Ovidio F, Engelen S, Ferrera I, Gasol JM, Guidi L, Hildebrand  
726 F, Kokoszka F, Lepoivre C, Lima-Mendez G, Poulain J, Poulos BT, Royo-  
727 Llonch M, Sarmiento H, Vieira-Silva S, Dimier C, Picheral M, Searson S,  
728 Kandels-Lewis S, Tara Oceans c, Bowler C, de Vargas C, Gorsky G, Grimsley  
729 N, Hingamp P, Iudicone D, Jaillon O, Not F, Ogata H, Pesant S, Speich S,  
730 Stemmann L, Sullivan MB, Weissenbach J, Wincker P, Karsenti E, Raes J,

- 731 Acinas SG, et al. 2015. Ocean plankton. Structure and function of the global  
732 ocean microbiome. *Science* 348:1261359.
- 733 57. Roik A, Rothig T, Roder C, Ziegler M, Kremb SG, Voolstra CR. 2016. Year-  
734 Long Monitoring of Physico-Chemical and Biological Variables Provide a  
735 Comparative Baseline of Coral Reef Functioning in the Central Red Sea.  
736 *PLoS One* 11:e0163939.
- 737 58. Brown EB. 1997. Coral bleaching: causes and consequences. *Coral Reefs*  
738 16:S129-S138.
- 739 59. Hughes TP, Kerry JT, Alvarez-Noriega M, Alvarez-Romero JG, Anderson KD,  
740 Baird AH, Babcock RC, Beger M, Bellwood DR, Berkelmans R, Bridge TC,  
741 Butler IR, Byrne M, Cantin NE, Comeau S, Connolly SR, Cumming GS,  
742 Dalton SJ, Diaz-Pulido G, Eakin CM, Figueira WF, Gilmour JP, Harrison HB,  
743 Heron SF, Hoey AS, Hobbs JA, Hoogenboom MO, Kennedy EV, Kuo CY,  
744 Lough JM, Lowe RJ, Liu G, McCulloch MT, Malcolm HA, McWilliam MJ,  
745 Pandolfi JM, Pears RJ, Pratchett MS, Schoepf V, Simpson T, Skirving WJ,  
746 Sommer B, Torda G, Wachenfeld DR, Willis BL, Wilson SK. 2017. Global  
747 warming and recurrent mass bleaching of corals. *Nature* 543:373-377.
- 748 60. ARC\_Centre\_of\_Excellence. 2017. Two-thirds of Great Barrier Reef hit by  
749 back-to-back mass coral bleaching. Media Release  
750 [https://www.coralcoe.org.au/media-releases/two-thirds-of-great-barrier-reef-](https://www.coralcoe.org.au/media-releases/two-thirds-of-great-barrier-reef-hit-by-back-to-back-mass-coral-bleaching)  
751 [hit-by-back-to-back-mass-coral-bleaching.](https://www.coralcoe.org.au/media-releases/two-thirds-of-great-barrier-reef-hit-by-back-to-back-mass-coral-bleaching)
- 752 61. Garren M, Son K, Raina J-B, Rusconi R, Menolascina F, Shapiro OH, Tout J,  
753 Bourne DG, Seymour JR, Stocker R. 2014. A bacterial pathogen uses  
754 dimethylsulfoniopropionate as a cue to target heat-stressed corals. *The ISME*  
755 *journal* 8:999-1007.

- 756 62. Garren M, Son K, Tout J, Seymour JR, Stocker R. 2016. Temperature-  
757 induced behavioral switches in a bacterial coral pathogen. *ISME J* 10:1363-  
758 72.
- 759 63. Tout J, Jeffries TC, Petrou K, Tyson GW, Webster NS, Garren M, Stocker R,  
760 Ralph PJ, Seymour JR. 2015. Chemotaxis by natural populations of coral reef  
761 bacteria. *ISME J* 9:1764-1777.
- 762 64. Muller EM, Rogers CS, Spitzack AS, van Woesik R. 2008. Bleaching  
763 increases likelihood of disease on *Acropora palmata* (Lamarck) in Hawksnest  
764 Bay, St John, US Virgin Islands. *Coral Reefs* 27:191-195.
- 765 65. Campbell AM, Fleisher J, Sinigalliano C, White JR, Lopez JV. 2015.  
766 Dynamics of marine bacterial community diversity of the coastal waters of the  
767 reefs, inlets, and wastewater outfalls of southeast Florida. *Microbiologyopen*  
768 4:390-408.
- 769 66. Buttigieg PL, Fadeev E, Bienhold C, Hehemann L, Offre P, Boetius A. 2018.  
770 Marine microbes in 4D-using time series observation to assess the dynamics  
771 of the ocean microbiome and its links to ocean health. *Curr Opin Microbiol*  
772 43:169-185.
- 773 67. Jarman SN, Berry O, Bunce M. 2018. The value of environmental DNA  
774 biobanking for long-term biomonitoring. *Nat Ecol Evol* 2:1192-1193.
- 775 68. Devlin MJ, Lourey MJ. 2000. Water quality - field and analytical procedures.  
776 Reef L-tMotGB, Australian Institute of Marine Science Townsville.
- 777 69. Lane DJ. 1991. 16S/23S rRNA sequencing, p 115–175. *In* Stackebrandt E,  
778 Goodfellow M (ed), *Nucleic acid techniques in bacterial systematics*. John  
779 Wiley and Sons, New York.



- 780 70. Turner S, Pryer KM, Miao VP, Palmer JD. 1999. Investigating deep  
781 phylogenetic relationships among cyanobacteria and plastids by small subunit  
782 rRNA sequence analysis. *J Eukaryot Microbiol* 46:327-38.
- 783 71. Bissett A, Fitzgerald A, Meintjes T, Mele PM, Reith F, Dennis PG, Breed MF,  
784 Brown B, Brown MV, Brugger J, Byrne M, Caddy-Retalic S, Carmody B,  
785 Coates DJ, Correa C, Ferrari BC, Gupta VVSR, Hamonts K, Haslem A,  
786 Hugenholtz P, Karan M, Koval J, Lowe AJ, Macdonald S, McGrath L, Martin  
787 D, Morgan M, North KI, Paungfoo-Lonhienne C, Pendall E, Phillips L, Pirzl R,  
788 Powell JR, Ragan MA, Schmidt S, Seymour N, Snape I, Stephen JR, Stevens  
789 M, Tinning M, Williams K, Yeoh YK, Zammit CM, Young A. 2016. Introducing  
790 BASE: the Biomes of Australian Soil Environments soil microbial diversity  
791 database. *Gigascience* 5.
- 792 72. Magoc T, Salzberg SL. 2011. FLASH: fast length adjustment of short reads to  
793 improve genome assemblies. *Bioinformatics* 27:2957-63.
- 794 73. Schloss PD, Westcott SL, Ryabin T, Hall JR, Hartmann M, Hollister EB,  
795 Lesniewski RA, Oakley BB, Parks DH, Robinson CJ, Sahl JW, Stres B,  
796 Thallinger GG, Van Horn DJ, Weber CF. 2009. Introducing mothur: open-  
797 source, platform-independent, community-supported software for describing  
798 and comparing microbial communities. *Appl Environ Microbiol* 75:7537-41.
- 799 74. Edgar RC. 2010. Search and clustering orders of magnitude faster than  
800 BLAST. *Bioinformatics* 26:2460-1.
- 801 75. Yilmaz P, Parfrey LW, Yarza P, Gerken J, Pruesse E, Quast C, Schweer T,  
802 Peplies J, Ludwig W, Glockner FO. 2014. The SILVA and "All-species Living  
803 Tree Project (LTP)" taxonomic frameworks. *Nucleic Acids Res* 42:D643-8.

- 804 76. Wang Q, Garrity GM, Tiedje JM, Cole JR. 2007. Naïve bayesian classifier for  
805 rapid assignment of rRNA sequences into the new bacterial taxonomy. *Appl*  
806 *Environ Microbiol* 73:5261-5267.
- 807 77. McMurdie PJ, Holmes S. 2013. phyloseq: an R package for reproducible  
808 interactive analysis and graphics of microbiome census data. *PLoS One*  
809 8:e61217.
- 810 78. R Development Core Team. 2008. R: A language and environment for  
811 statistical computing. R Foundation for Statistical Computing.
- 812 79. Oksanen J, Blanchet FG, Kindt R, Legendre P, Minchin PR, O'Hara RB,  
813 Simpson GL, Solymos P, Stevens MHH, Wagner H. 2013. *vegan: Community*  
814 *Ecology Package*. R package version 20-9.
- 815 80. Clark- Carter D (ed). 2014. *z Scores*. Wiley StatsRef,
- 816 81. Dormann CF, Elith J, Bacher S, Buchmann C, Carl G, Carre G, Marquez JRG,  
817 Gruber B, Lafourcade B, Leitao PJ, Munkemuller T, McClean C, Osborne PE,  
818 Reineking B, Schroder B, Skidmore AK, Zurell D, Lautenbach S. 2013.  
819 *Collinearity: a review of methods to deal with it and a simulation study*  
820 *evaluating their performance*. *Ecography* 36:27-46.
- 821 82. Kuhn M. 2008. *Caret package*. *Journal of Statistical Software* 28.
- 822 83. Liaw A, Wiener M. 2002. *Classification and Regression by randomForest*. *R*  
823 *News* 2:18-22.

824

825

826

827

828

829 **Figure 1. Habitat-specificity of coral reef microbiomes.** Seawater, sediment,  
830 coral (*Acropora tenuis* and *Acropora millepora*), sponge (*Amphimedon*  
831 *queenslandica* and *Coscinoderma matthewsi*) and macroalgae (*Sargassum sp.*)  
832 samples were collected for 16S rRNA gene sequencing at fringing reefs surrounding  
833 Magnetic Island (Geoffrey Bay) and Orpheus Island (Pioneer Bay and Channel;  
834 Queensland, Australia). Non-metric multidimensional scaling (NMDS) based on  
835 Bray-Curtis dissimilarities revealed high habitat-specificity of coral reef microbiomes.

836

837 **Figure 2. Compositional similarity of coral reef microbiomes over time a)**  
838 Variations in the compositional similarity among and within sampling time points of  
839 various coral reef microbiomes collected at Geoffrey Bay (Magnetic Island). A higher  
840 similarity within time point replicates than among time point replicates suggests a  
841 uniform response of the microbial community to temporal variations. Similarities were  
842 calculated with Bray-Curtis Similarity Index (0=no similarity, 1=high similarity) and  
843 significances tested with Wilcoxon rank-sum test. b) The within sampling time point  
844 similarities of replicates (n=3) is indicated in colour and the coefficient of variation  
845 (dispersion) is displayed as size. Analysis of Similarity (ANOSIM) was further used  
846 as a proxy for the within and among time point variation. R-values of 1 indicate high  
847 similarity within sampling time points and high variability among sampling time  
848 points, whereas 0 indicates equal similarity within and among sampling time points.

849

850 **Figure 3. Coral reef microbiome sensitivity to environmental parameters.** Bray-  
851 Curtis distance-based RDA (dbRDA) was used to evaluate the effect of  
852 environmental fluctuations on the microbial community composition of various coral  
853 reef habitats/hosts. a) Environmental factors significantly explained 56% of the  
854 observed compositional variation in the seawater associated microbial community. b)  
855 Variation partitioning shows that environmental parameters rather than season and  
856 sampling date explain observed community composition structures in the seawater  
857 microbiome. c) Coral mucus and algae biofilm as well as d) coral and sponge tissue  
858 microbial communities were significantly influenced by environmental factors;  
859 however, environmental parameters only explain on average 11% of the observed  
860 community variation.

861

862 **Figure 4. Microbial indicator taxa for seawater temperature fluctuations.**  
863 Seawater temperatures were z-score standardised and, based on their variation  
864 around their mean, classified into low ( $< -0.5$ ), average ( $-0.5 - 0.5$ ) and high ( $> 0.5$ )  
865 temperature groups. Indicator zOTUs were identified with the Indicator Value  
866 analysis (IndVal). a) The average relative abundance of the sum of low, average and  
867 high temperature indicators is represented for each sampling time point. Significant  
868 indicator zOTUs assemblages ( $p < 0.01$ ) for the respective temperature group are  
869 indicated in black and size represents the coefficient of variation. Colour gradient  
870 further represents the seawater temperature at the given sampling timepoints. b)  
871 Relative abundances and taxonomic affiliation of zOTUs identified to be significant  
872 ( $p < 0.01$ ) indicators for high and low seawater temperatures. Each dot represents a  
873 unique zOTU.

874

875 **Figure 5. Random Forest machine learning** a) The 30 most important zOTUs  
876 reducing the uncertainty in the prediction of seawater temperature classes (low,  
877 average, high) based on their mean decrease in accuracy and b) their enrichment in  
878 the temperature classes. c) The 30 most important zOTUs reducing the variance  
879 (mean squared error (% Inc MSE)) in regression based prediction of seawater  
880 temperatures. d) Predicted seawater temperature values *versus* actual seawater  
881 temperature values based on Random Forest regression.  
882

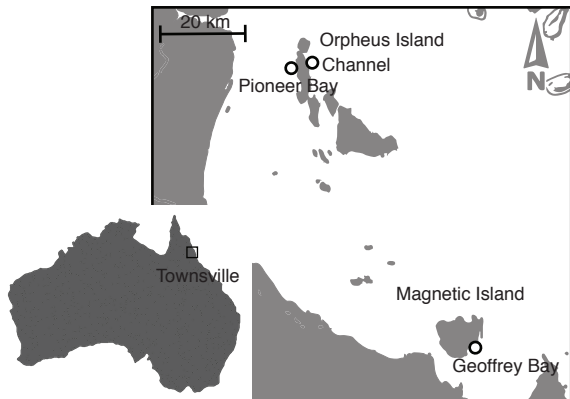

### Magnetic Island, Geoffrey Bay

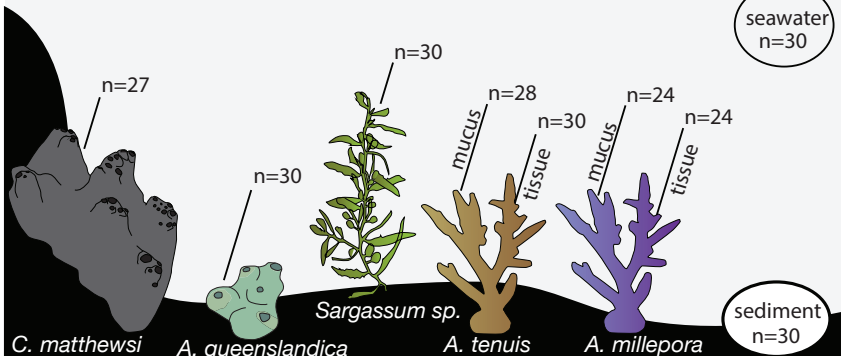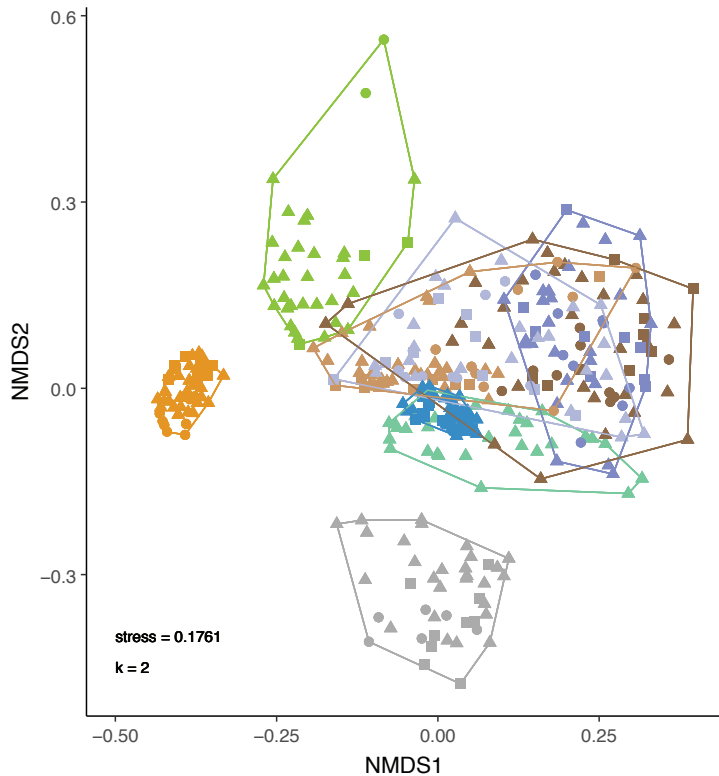

### Orpheus Island, Pioneer Bay

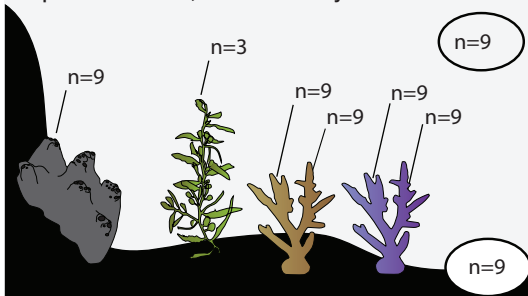

### Orpheus Island, Channel

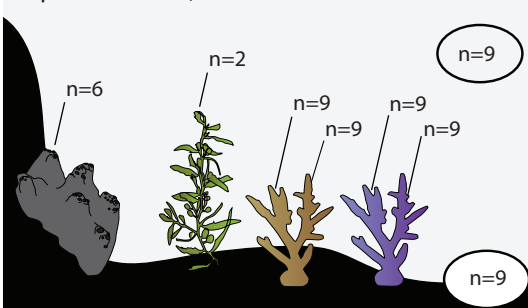

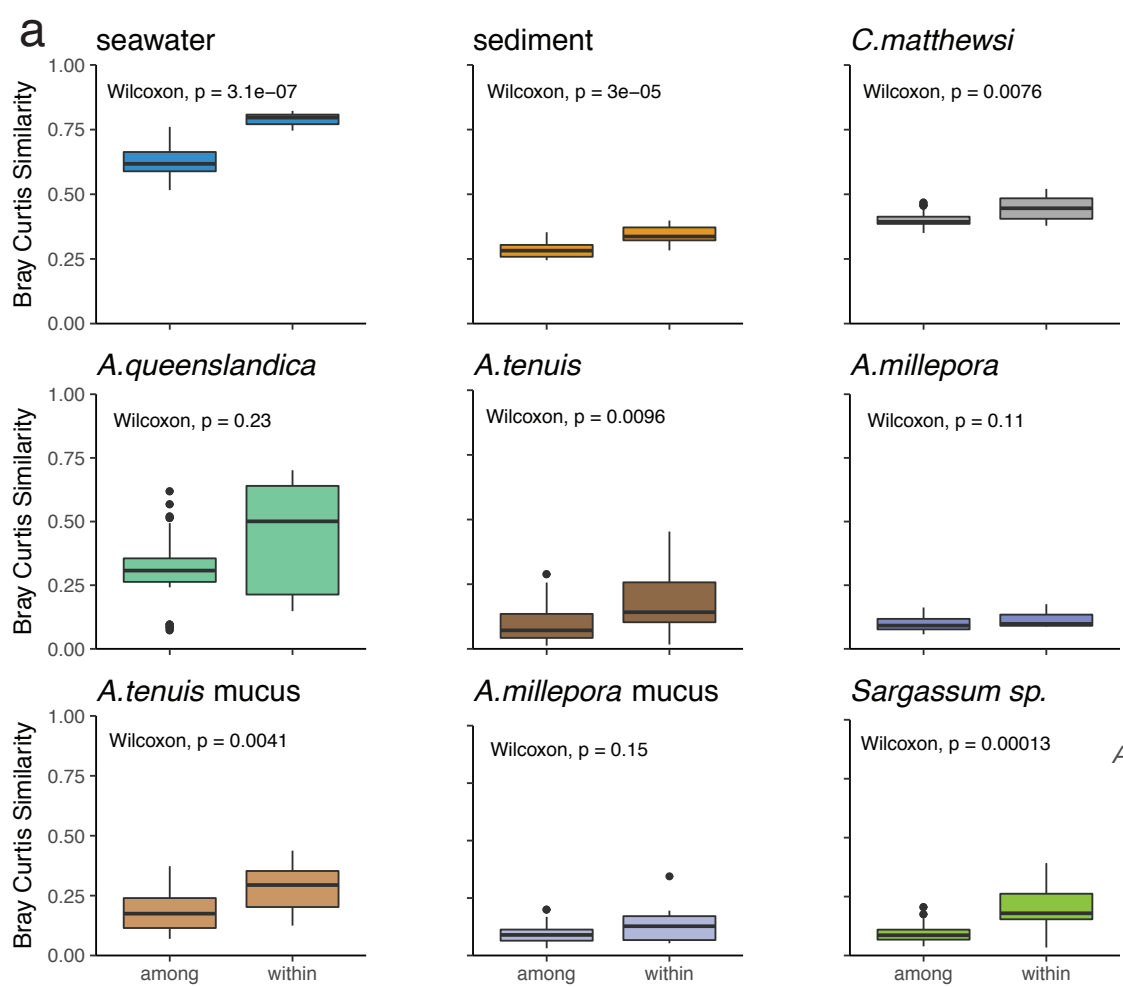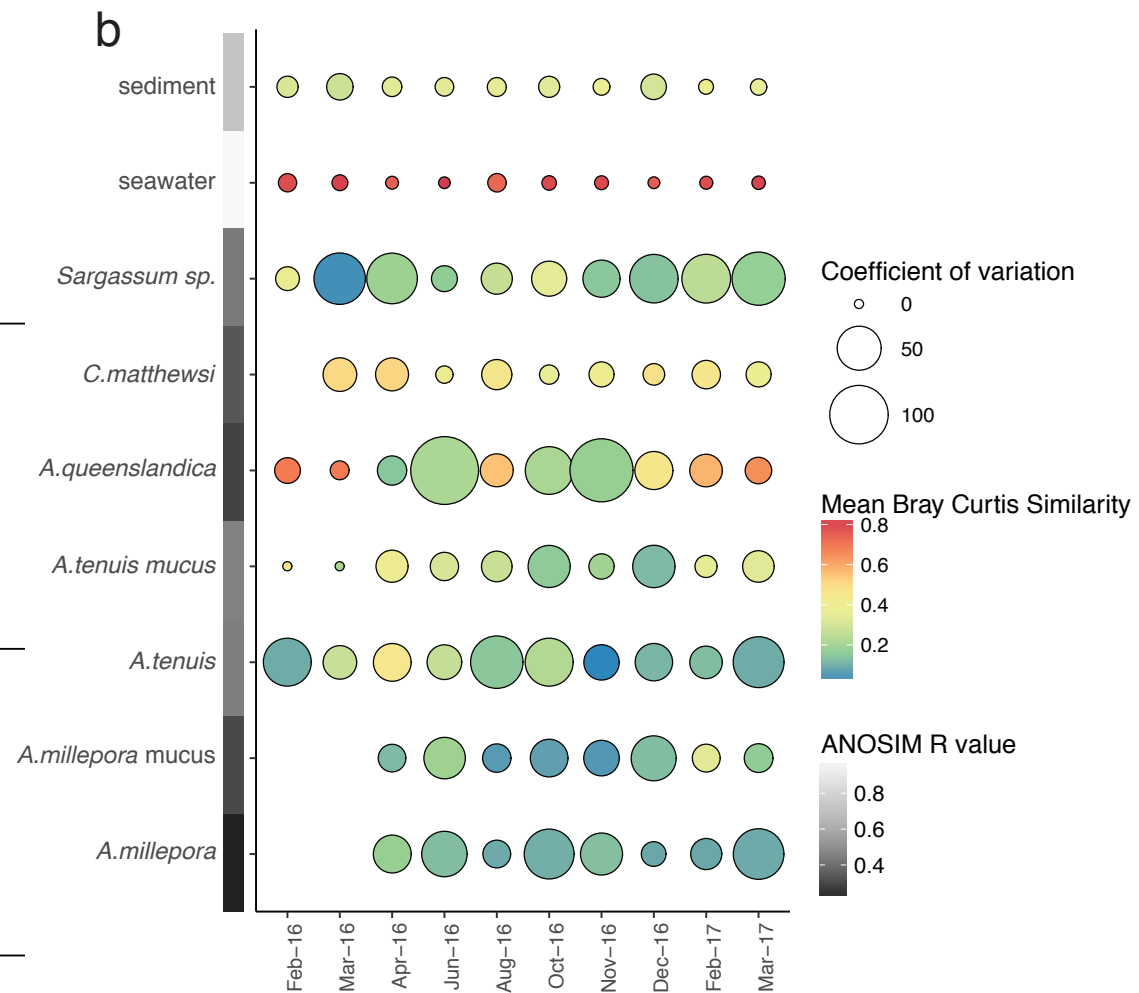

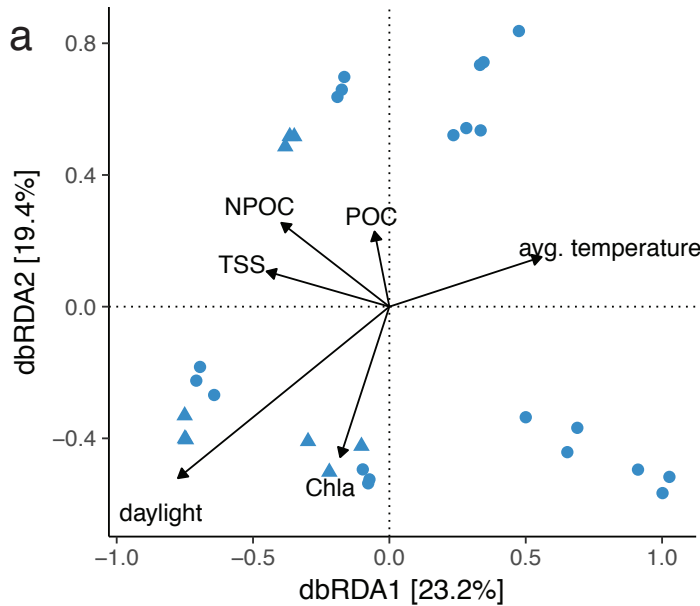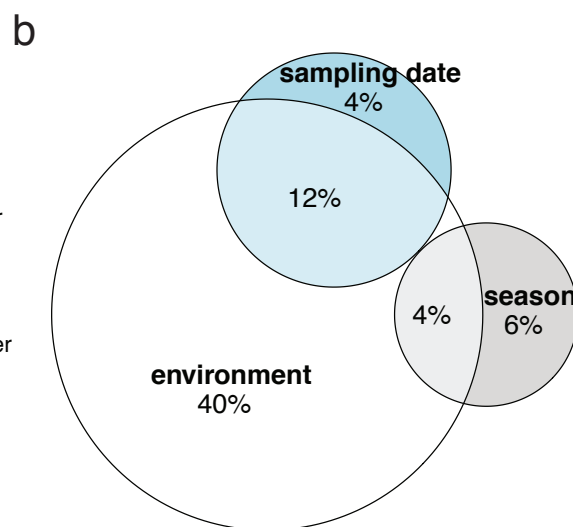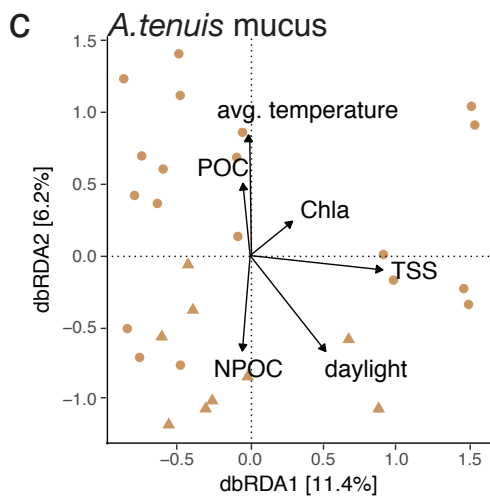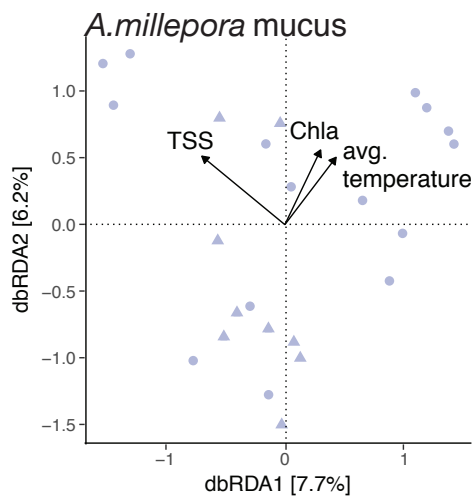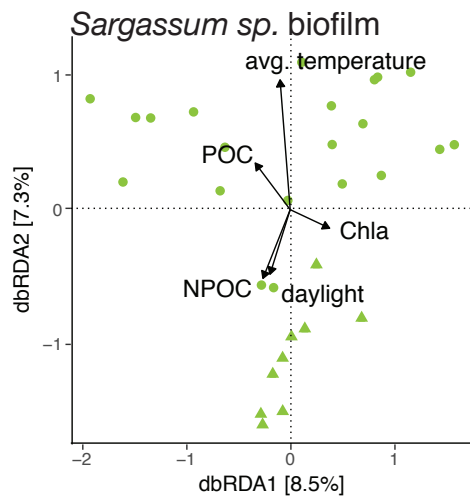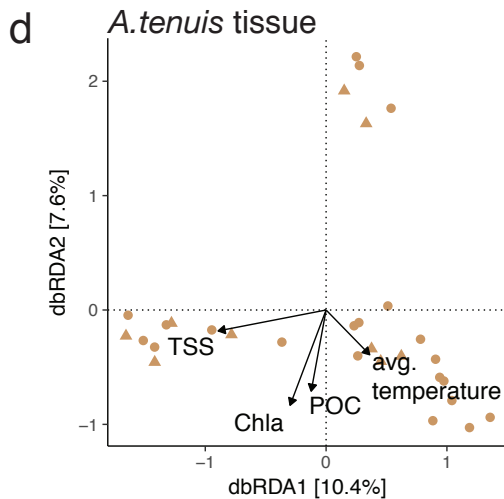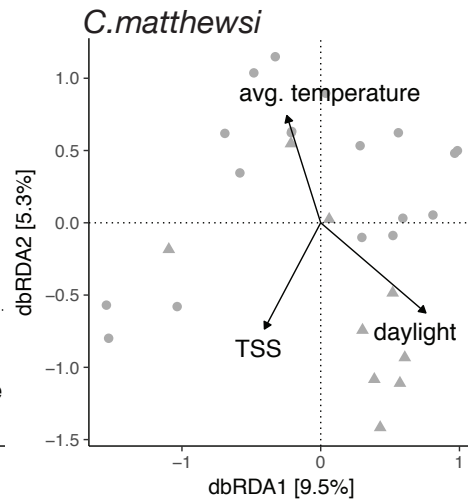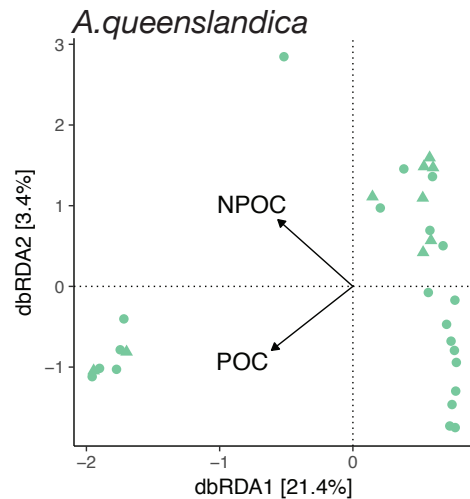



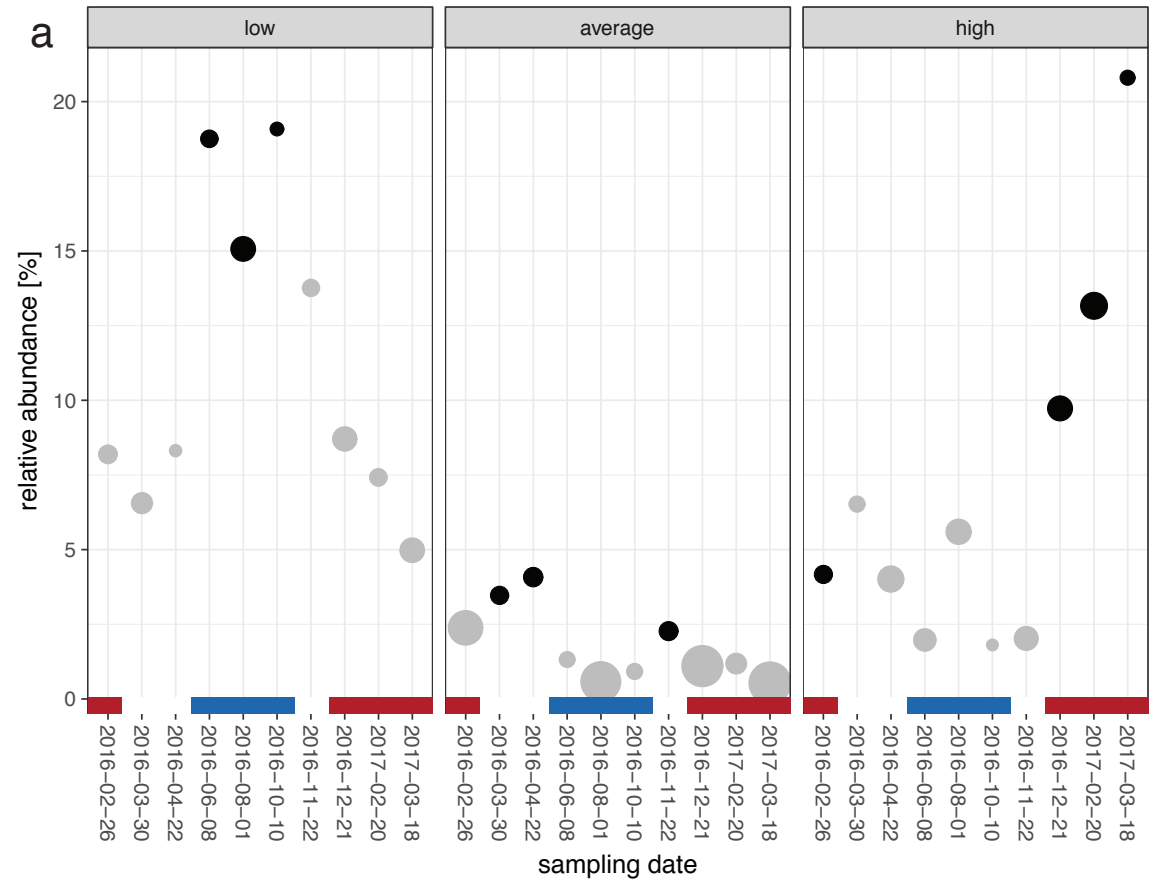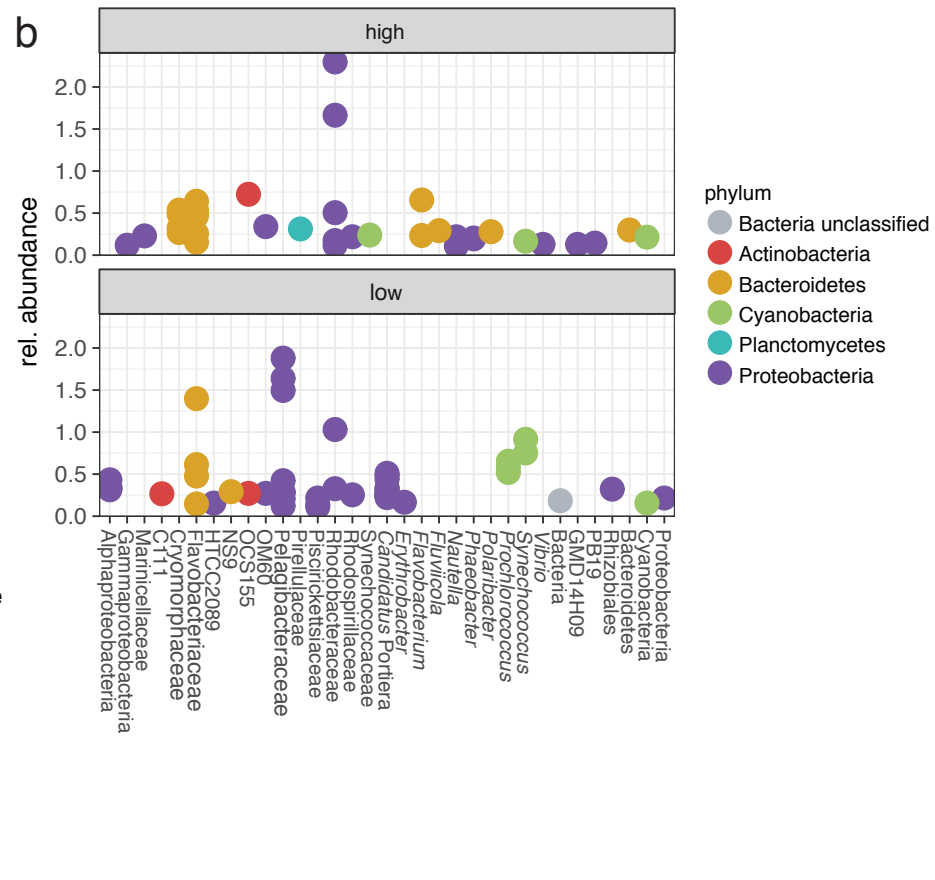

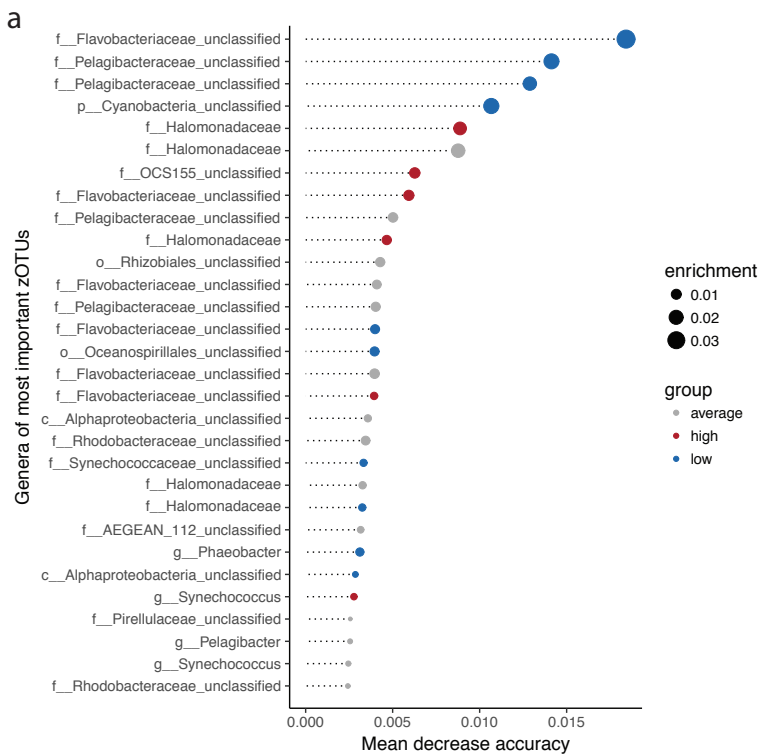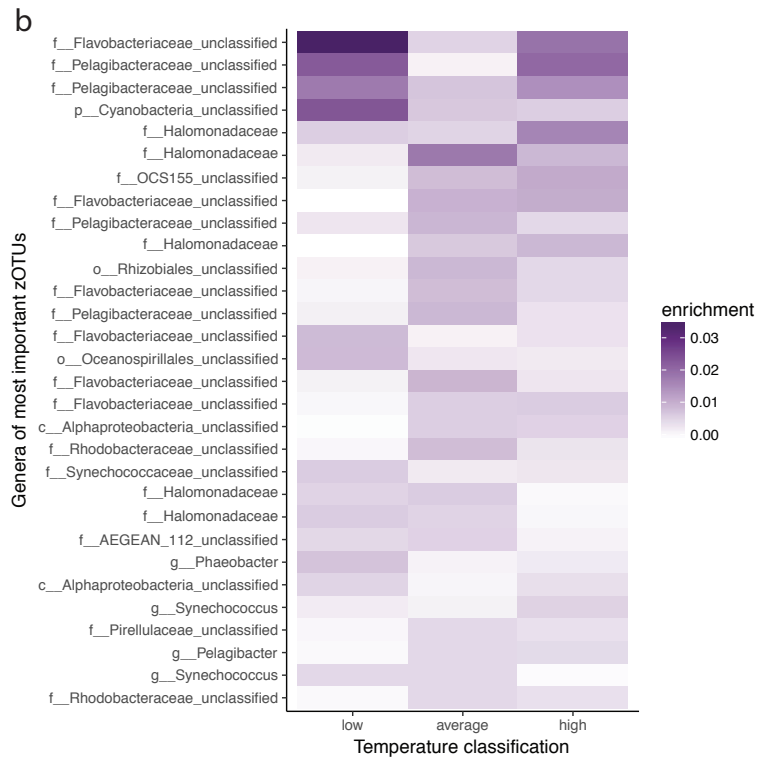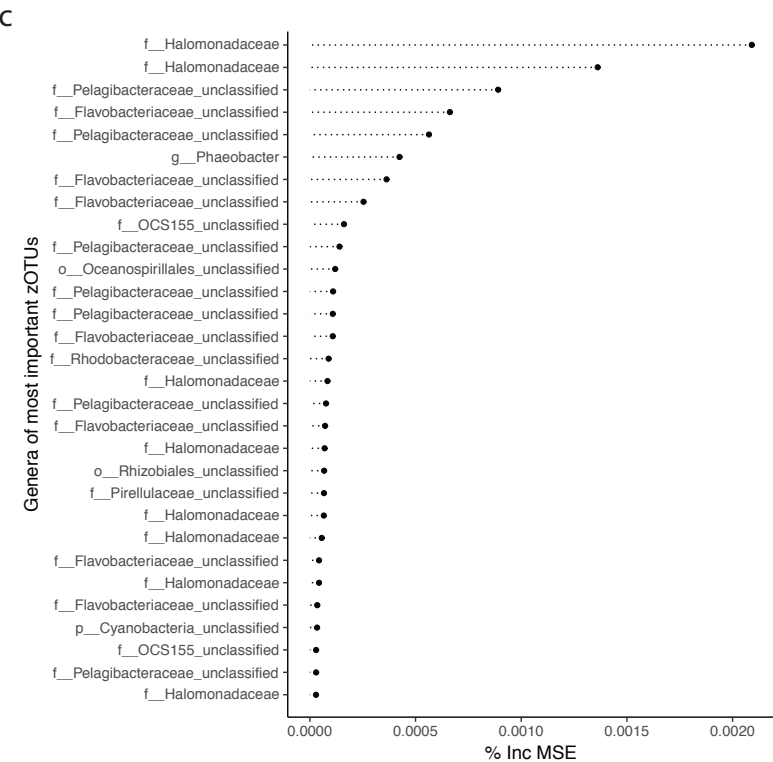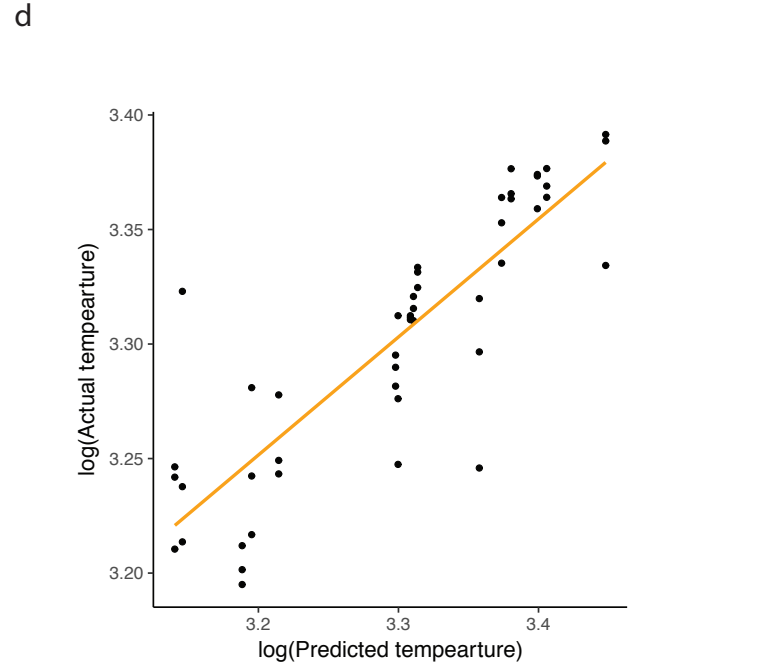

Source: http://biorxiv.org/content/10.1101/524173v1.full.pdf
